# Supplementary material
Source: PubMed Central journal article supplement (PMC6078601)
Supplement: ddw346_supp.pdf [file ddw346_supp.pdf]

Population structure of Han Chinese in the modern  
Taiwanese population based on 10,000 participants in  
the Taiwan Biobank project  
*by Chen et al.*

Supplementary Information  
(Supplementary tables and figures)

## **Supplementary Tables**

S1 Table. Number of SNPs genotyped in TWB

S2 Table. Breakdown of TWB by genetic clusters and self-reported origins in subgroups under a model of K=4 ancestry origins.

S3 Table The fixation index ( $F_{st}$ )\* between subgroups of TWB

S4 Table. Major HLA-A-B haplotypes in an independent sample of Taiwanese (n=442), who have been HLA-genotyped.

S5 Table. Major HLA-A-B-T-allele(rs2233947:T) haplotypes in an independent sample of Taiwanese (n=442).

S6 Table. Power calculations

## S1 Table. Number of SNPs genotyped in TWB

| Chromosome   | Number of SNPs | QC*           |
|--------------|----------------|---------------|
| 1            | 46936          | 43949         |
| 2            | 52013          | 48210         |
| 3            | 46611          | 43215         |
| 4            | 41551          | 38154         |
| 5            | 39064          | 36421         |
| 6            | 46240          | 42584         |
| 7            | 35555          | 32969         |
| 8            | 35448          | 33079         |
| 9            | 30237          | 28342         |
| 10           | 32777          | 30792         |
| 11           | 30126          | 28164         |
| 12           | 31041          | 28948         |
| 13           | 23435          | 21696         |
| 14           | 21432          | 19804         |
| 15           | 21892          | 20442         |
| 16           | 21161          | 20011         |
| 17           | 16082          | 15099         |
| 18           | 20321          | 18909         |
| 19           | 10153          | 9426          |
| 20           | 15642          | 14805         |
| 21           | 9826           | 9069          |
| 22           | 7316           | 6960          |
| X+           | 12721          | 12721         |
| Y+           | 1942           | 1942          |
| Mt+          | 189            | 189           |
| <b>Total</b> | <b>649711</b>  | <b>605900</b> |

\*Quality control (QC): a SNP was included if the following three criteria were met: (1) minor allele frequency  $\geq 1\%$ , (2) genotyping call rate  $\geq 95\%$ , (3) Hardy-Weinberg equilibrium proportion test p-value  $> 0.0001$ .

+ All of the data for SNPs on chromosome X and Y and mitochondria (Mt) were included without the quality control stated above.

**S2 Table. Breakdown of TWB by genetic clusters and self-reported origins in subgroups under a model of K=4 ancestry origins.**

| Self-reported origins+ | T1                      | T2                      | T3                        | T4                      | T total                   | S1                      | S2                        | S3                        | S total                   | N1                       | N2                      | N total                  | O                      | Total |
|------------------------|-------------------------|-------------------------|---------------------------|-------------------------|---------------------------|-------------------------|---------------------------|---------------------------|---------------------------|--------------------------|-------------------------|--------------------------|------------------------|-------|
| N_N                    | 0<br>(0.0%,<br>0.0%)    | 0<br>(0.0%,<br>0.0%)    | 0<br>(0.0%,<br>0.0%)      | 2<br>(2.7%,<br>2.0%)    | 2<br>(2.7%,<br>0.1%)      | 0<br>(0.0%,<br>0.0%)    | 4<br>(5.4%,<br>0.5%)      | 1<br>(1.4%,<br>0.0%)      | 5<br>(6.8%,<br>0.1%)      | 16<br>(21.6%,<br>3.6%)   | 51<br>(68.9%,<br>51.5%) | 67<br>(90.5%,<br>12.3%)  | 0<br>(0.0%,<br>0.0%)   | 74    |
| S_S                    | 96<br>(0.9%,<br>100.0%) | 134<br>(1.3%,<br>96.4%) | 1227<br>(11.8%,<br>99.4%) | 69<br>(0.7%,<br>67.7%)  | 1526<br>(14.7%,<br>97.1%) | 125<br>(1.2%,<br>99.2%) | 5512<br>(53.2%,<br>98.6%) | 2893<br>(27.9%,<br>99.1%) | 8530<br>(82.2%,<br>98.8%) | 257<br>(2.5%,<br>57.6%)  | 11<br>(0.1%,<br>11.1%)  | 268<br>(2.6%,<br>49.2%)  | 47<br>(0.5%,<br>94.0%) | 10371 |
| Admixture              | 0<br>(0.0%,<br>0.0%)    | 4<br>(1.5%,<br>2.9%)    | 4<br>(1.5%,<br>0.3%)      | 28<br>(10.3%,<br>27.4%) | 36<br>(13.3%,<br>2.3%)    | 0<br>(0.0%,<br>0.0%)    | 46<br>(17.0%,<br>0.8%)    | 14<br>(5.17%,<br>0.5%)    | 60<br>(22.1%,<br>0.7%)    | 155<br>(57.2%,<br>34.8%) | 19<br>(7.0%,<br>19.2%)  | 174<br>(64.2%,<br>31.9%) | 1<br>(0.4%,<br>2.0%)   | 271   |
| Unknown                | 0<br>(0.0%,<br>0.0%)    | 1<br>(1.2%,<br>0.7%)    | 3<br>(3.5%,<br>0.2%)      | 3<br>(3.5%,<br>2.9%)    | 7<br>(8.2%,<br>0.4%)      | 1<br>(1.2%,<br>0.8%)    | 27<br>(31.8%,<br>0.5%)    | 12<br>(14.1%,<br>0.4%)    | 40<br>(47.1%,<br>0.5%)    | 18<br>(21.2%,<br>4.4%)   | 18<br>(21.2%,<br>18.2%) | 36<br>(42.4%,<br>6.6%)   | 2<br>(2.4%,<br>4.0%)   | 85    |
| Total                  | 96                      | 139                     | 1234                      | 102                     | 1571                      | 126                     | 5589                      | 2920                      | 8635                      | 446                      | 99                      | 545                      | 50                     | 10801 |

\* Number of individuals and percentages by row and by column.

+ N\_N for subjects with both parents being of northern Han Chinese descent, S\_S for subjects with both parents being of southern Han Chinese descent, admixture for subjects with one parent of southern Han Chinese descent and the other being of Northern Han Chinese descent or for subjects with at least one parent being an admixture of southern and northern Han Chinese descent, and unknown for subjects with an unknown origin for at least one parent.

# O, Others unable to be defined.

### S3 Table The fixation index ( $F_{st}$ )\* between subgroups of TWB

|    | T1       | T2       | T3       | T4       | S1       | S2       | S3       | N1       | N2       |
|----|----------|----------|----------|----------|----------|----------|----------|----------|----------|
| T1 |          | 0.000535 | 0.001532 | 0.002661 | 0.007799 | 0.006863 | 0.005101 | 0.006865 | 0.007272 |
| T2 | 0.000667 |          | 0.000267 | 0.001138 | 0.004481 | 0.003647 | 0.002364 | 0.003815 | 0.00456  |
| T3 | 0.001075 | 0.000207 |          | 0.000694 | 0.002822 | 0.00192  | 0.001053 | 0.002311 | 0.003334 |
| T4 | 0.002372 | 0.001017 | 0.000686 |          | 0.003522 | 0.002142 | 0.001335 | 0.00117  | 0.001244 |
| S1 | 0.004733 | 0.003163 | 0.002149 | 0.003062 |          | 0.000925 | 0.001072 | 0.002372 | 0.004738 |
| S2 | 0.003528 | 0.00264  | 0.001643 | 0.002214 | 0.000888 |          | 0.000186 | 0.000851 | 0.002645 |
| S3 | 0.002726 | 0.001672 | 0.000832 | 0.001216 | 0.001033 | 0.000244 |          | 0.000844 | 0.002349 |
| N1 | 0.004047 | 0.002829 | 0.00187  | 0.001027 | 0.002284 | 0.000894 | 0.000833 |          | 0.000526 |
| N2 | 0.005364 | 0.003755 | 0.003032 | 0.001059 | 0.00453  | 0.00285  | 0.002292 | 0.000515 |          |

- $F_{st}$  was computed based on 591,048 SNPs, using the method introduced in “Estimating F-Statistics for the Analysis of Population Structure” by B. S. Weir and C. Clark Cockerham, Evolution, Vol. 38, No. 6 (Nov., 1984), pp. 1358-1370 , implemented in PLINK 1.9
- Upper triangular matrix is Weighted Fst estimate.
- Lower triangular matrix is Mean Fst estimate.

**S4 Table. Major HLA-A-B haplotypes in an independent sample of Taiwanese (n=442), who have been HLA-genotyped.**

| HLA   | A*33:03-<br>B*58:01 |    | A*11:01-<br>B*40:01 |    | A*02:01-<br>B*40:01 |    | A*02:07-<br>B*46:01 |    | A*11:01-<br>B*13:01 |    | A*11:01-<br>B*15:02 |    | A*11:01-<br>B*27:04 |    | A*24:02-<br>B*40:01 |    |                    |
|-------|---------------------|----|---------------------|----|---------------------|----|---------------------|----|---------------------|----|---------------------|----|---------------------|----|---------------------|----|--------------------|
|       | Total               | N  | Freq. <sup>+</sup>  | N  | Freq. <sup>+</sup> |
| T1    | 4                   | 4  | 1.000               | 0  | 0.000               | 0  | 0.000               | 0  | 0.000               | 0  | 0.000               | 0  | 0.000               | 0  | 0.000               | 0  | 0.000              |
| T2    | 12                  | 8  | 0.667               | 0  | 0.000               | 1  | 0.083               | 0  | 0.000               | 0  | 0.000               | 0  | 0.000               | 0  | 0.000               | 0  | 0.000              |
| T3    | 90                  | 42 | 0.467               | 8  | 0.089               | 1  | 0.011               | 2  | 0.022               | 3  | 0.033               | 1  | 0.011               | 1  | 0.011               | 2  | 0.022              |
| T4    | 6                   | 2  | 0.333               | 0  | 0.000               | 0  | 0.000               | 0  | 0.000               | 0  | 0.000               | 0  | 0.000               | 0  | 0.000               | 0  | 0.000              |
| S1    | 10                  | 0  | 0.000               | 1  | 0.100               | 0  | 0.000               | 3  | 0.300               | 0  | 0.000               | 0  | 0.000               | 1  | 0.100               | 0  | 0.000              |
| S2    | 406                 | 1  | 0.002               | 54 | 0.133               | 12 | 0.030               | 55 | 0.136               | 18 | 0.044               | 20 | 0.049               | 11 | 0.027               | 20 | 0.049              |
| S3    | 256                 | 12 | 0.047               | 34 | 0.133               | 3  | 0.012               | 4  | 0.016               | 13 | 0.051               | 0  | 0.000               | 7  | 0.027               | 16 | 0.063              |
| N1    | 62                  | 0  | 0.000               | 3  | 0.048               | 1  | 0.016               | 6  | 0.097               | 0  | 0.000               | 3  | 0.048               | 0  | 0.000               | 2  | 0.032              |
| N2    | 26                  | 1  | 0.038               | 0  | 0.000               | 2  | 0.077               | 1  | 0.038               | 0  | 0.000               | 0  | 0.000               | 0  | 0.000               | 0  | 0.000              |
| O*    | 12                  | 3  | 0.250               | 1  | 0.083               | 0  | 0.000               | 1  | 0.083               | 0  | 0.000               | 0  | 0.000               | 1  | 0.083               | 0  | 0.000              |
| T     | 112                 | 56 | 0.500               | 8  | 0.071               | 2  | 0.018               | 2  | 0.018               | 3  | 0.027               | 1  | 0.009               | 1  | 0.009               | 2  | 0.018              |
| S     | 672                 | 13 | 0.019               | 89 | 0.132               | 15 | 0.022               | 62 | 0.092               | 31 | 0.046               | 20 | 0.030               | 19 | 0.028               | 36 | 0.054              |
| N     | 88                  | 1  | 0.011               | 3  | 0.034               | 3  | 0.034               | 7  | 0.080               | 0  | 0.000               | 3  | 0.034               | 0  | 0.000               | 2  | 0.023              |
| Total | 844                 |    | 0.083               |    | 0.114               |    | 0.023               |    | 0.081               |    | 0.038               |    | 0.027               |    | 0.024               |    | 0.045              |

<sup>+</sup>Frequency of specific HLA haplotypes in individual subgroups.

<sup>+</sup>Others, unable to be defined.

**S5 Table. Major HLA-A-B-T-allele(rs2233947:T) haplotypes in an independent sample of Taiwanese (n=442).**

| Haplotype<br>A-B-T | Frequency | StdErr* | LowerCL <sup>+</sup> | UpperCL <sup>+</sup> |
|--------------------|-----------|---------|----------------------|----------------------|
| 11:01-40:01-C      | 0.11096   | 0.01057 | 0.09024              | 0.13167              |
| 33:03-58:01-T      | 0.08232   | 0.00925 | 0.06419              | 0.10045              |
| 02:07-46:01-C      | 0.08047   | 0.00915 | 0.06252              | 0.09841              |
| 24:02-40:01-C      | 0.04347   | 0.00686 | 0.03002              | 0.05691              |
| 11:01-13:01-C      | 0.03416   | 0.00611 | 0.02218              | 0.04614              |
| 11:01-15:02-C      | 0.02646   | 0.0054  | 0.01588              | 0.03705              |
| 02:01-40:01-C      | 0.02452   | 0.0052  | 0.01432              | 0.03472              |
| 11:01-27:04-C      | 0.02333   | 0.00508 | 0.01337              | 0.03329              |
| 11:01-55:02-C      | 0.01896   | 0.00459 | 0.00997              | 0.02796              |
| 11:01-51:01-C      | 0.01803   | 0.00448 | 0.00926              | 0.02681              |

\*Standard error of estimation

<sup>+</sup>Lower and upper confidence limit of estimation.

## S6 Table. Power calculations.

| Controls | Cases | Prevalence | Disease allele frequency | Power* | Genotype relative risk |        |      |
|----------|-------|------------|--------------------------|--------|------------------------|--------|------|
| 10801    | 1000  | 0.01       | 0.05                     | 0.8181 | 1.77                   |        |      |
|          |       |            | 0.1                      | 0.7950 | 1.54                   |        |      |
|          |       |            | 0.2                      | 0.8199 | 1.41                   |        |      |
|          |       | 0.05       | 0.05                     | 0.8146 | 1.78                   |        |      |
|          |       |            | 0.1                      | 0.8089 | 1.55                   |        |      |
|          |       |            | 0.2                      | 0.8125 | 1.41                   |        |      |
|          | 0.1   | 0.05       | 0.05                     | 0.8057 | 1.79                   |        |      |
|          |       |            | 0.1                      | 0.8182 | 1.56                   |        |      |
|          |       |            | 0.2                      | 0.8031 | 1.41                   |        |      |
|          |       | 10801      | 2000                     | 0.01   | 0.05                   | 0.8185 | 1.55 |
|          |       |            |                          |        | 0.1                    | 0.8083 | 1.39 |
|          |       |            |                          |        | 0.2                    | 0.8031 | 1.29 |
| 0.05     | 0.05  |            |                          | 0.8024 | 1.55                   |        |      |
|          | 0.1   |            |                          | 0.7981 | 1.39                   |        |      |
|          | 0.2   |            |                          | 0.7974 | 1.29                   |        |      |
| 0.1      | 0.05  |            |                          | 0.05   | 0.8096                 | 1.56   |      |
|          |       |            |                          | 0.1    | 0.7851                 | 1.39   |      |
|          |       |            |                          | 0.2    | 0.7904                 | 1.29   |      |
| 10801    | 3000  | 0.01       | 0.05                     | 0.8169 | 1.46                   |        |      |
|          |       |            | 0.1                      | 0.8229 | 1.33                   |        |      |
|          |       |            | 0.2                      | 0.8460 | 1.25                   |        |      |
|          |       |            | 0.05                     | 0.05   | 0.8034                 | 1.46   |      |
|          |       |            |                          | 0.1    | 0.8146                 | 1.33   |      |
|          |       |            |                          | 0.2    | 0.8417                 | 1.25   |      |
|          |       | 0.1        | 0.05                     | 0.05   | 0.8192                 | 1.47   |      |
|          |       |            |                          | 0.1    | 0.8040                 | 1.33   |      |
|          |       |            |                          | 0.2    | 0.8363                 | 1.25   |      |

\*The calculation was based on CaTS. Skol AD, Scott LJ, Abecasis GR and Boehnke M (2006) Joint analysis is more efficient than replication-based analysis for two-stage genome-wide association studies. Nat Genet 38:209-13.



## Supplementary Figures

S1 Fig. PCA and admixture analysis of TWB and reference populations from the 1000 Genomes Projects.

S2 Fig. The current residence of the four subgroups (N, S2, T1 and S1).

S3 Fig. Allele frequencies of the major alleles of the top SNPs identified in the N-S GWAS.

S4 Fig. Haplotype similarity in the MHC region of chromosome 6 among different subgroups from the TWB detected by fineSTRUCTURE.

S5 Fig. Proportion of the HLA-A\*33:03-B\*58:01 haplotype in the subgroups of 10,801 TWB participants.

S6 Fig. Significance levels (P values) of differences in the physical examination indices and biochemical measures between the (S2+S3) and the (T1–T4) subgroups.

S7 Fig. The proportion of HLA-A\*33:03-B\*58:01 in populations residing in east and southeast regions of Asia.

S8 Fig. PCA plots for TWB and 1000G EAS (East Asian) samples with or without SNPs on chromosome 6.

S9 Fig. PCA plots for 1679, 3467 and 7200 subjects from TWB and 1000G East Asian samples.

S10 Fig. Detection of uncertain kinship and ethnicity outliers among the genotyped samples.

## **S1 Fig. PCA and admixture analysis of TWB and reference populations from the 1000 Genomes Projects.**

(A) the scatter plot of the first two PCs showed different continental groups. (B) PCA plot for the TWB (n = 10,801) and 504 Asian samples of 1000G. A north-to-south trend, from the JPT, CHB, CHS, TWB, KHV and CDX samples. (C) the scatter plot of the first two PCs showed that the Min-nan and Hakka groups could not be clearly discriminated. (D) the mean value of PC1 for self-reported origins of the TWB samples, where the the position along PC1 correlates roughly with self-reported N-S cline. (E) the individual ancestry-assigning probabilities under the best model of K=9 ancestry populations. All East Asian groups (TWB, CHB, CHD, JPT, KHV, CDX) shared higher proportions of the ancestry-assigning probabilities of K5 and K9. The abbreviations of individual groups are the same as those in (A).

**S1A Fig.**

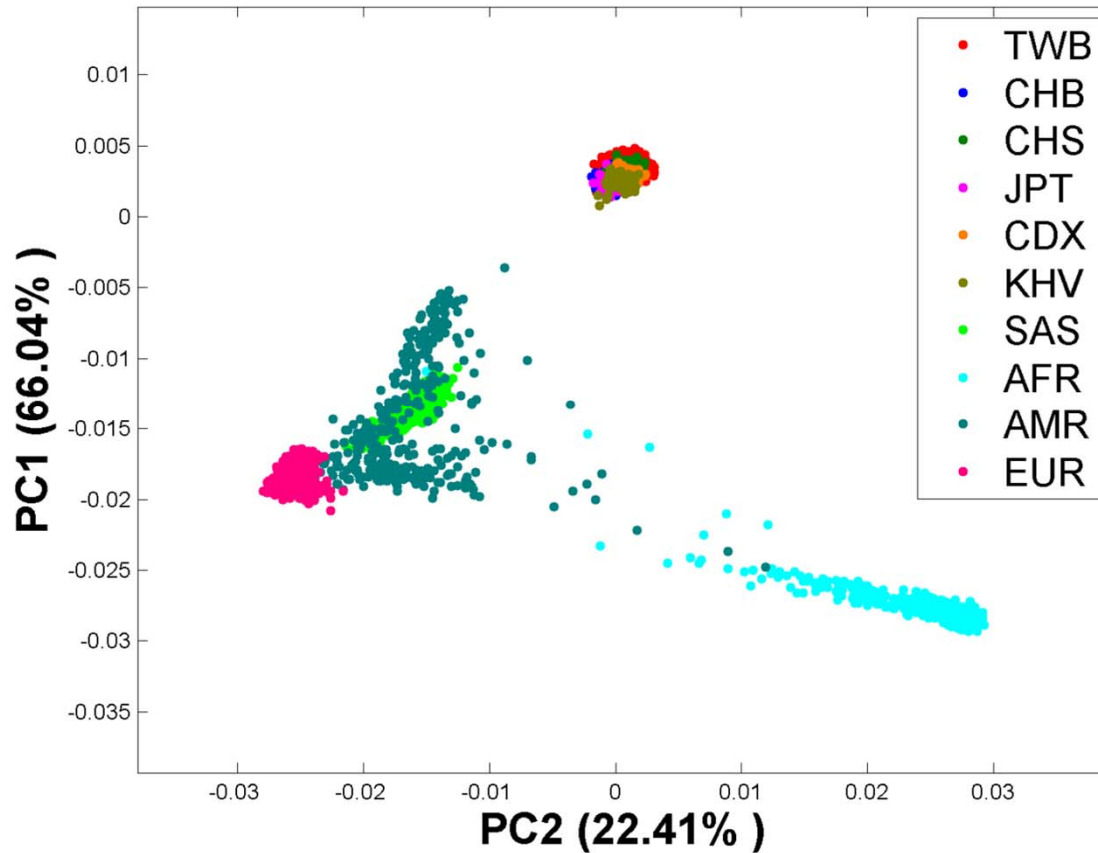

**Reference populations in 1000 Genome**

**AMR (Americas)**

- CLM Colombian in Medellin, Colombia
- MXL Mexican Ancestry in Los Angeles, California
- PEL Peruvian in Lima, Peru
- PUR Puerto Rican in Puerto Rico

**SAS (Southern Asians)**

- BEB Bengali in Bangladesh
- GIH Gujarati Indian in Houston, TX
- ITU Indian Telugu in the UK
- PJL Punjabi in Lahore, Pakistan
- STU Sri Lankan Tamil in the UK

**EAS (East Asians)**

- CDX Chinese Dai in Xishuangbanna, China
- CHB Han Chinese in Beijing, China
- CHD Chinese in Denver, Colorado
- CHS Southern Han Chinese, China
- JPT Japanese in Tokyo, Japan
- KHV Kinh in Ho Chi Minh City, Vietnam

**EUR (Europeans)**

- CEU Utah residents with Northern and Western European ancestry
- IBS Iberian populations in Spain
- FIN Finnish in Finland
- GBR British in England and Scotland
- TSI Toscani in Italy

**AFR (Africans)**

- ACB African Caribbean in Barbados
- ASW African Ancestry in Southwest US
- ESN Esan in Nigeria
- GWD Gambian in Western Division, The Gambia
- LWK Luhya in Webuye, Kenya
- MSL Mende in Sierra Leone
- YRI Yoruba in Ibadan, Nigeria

**S1B Fig**

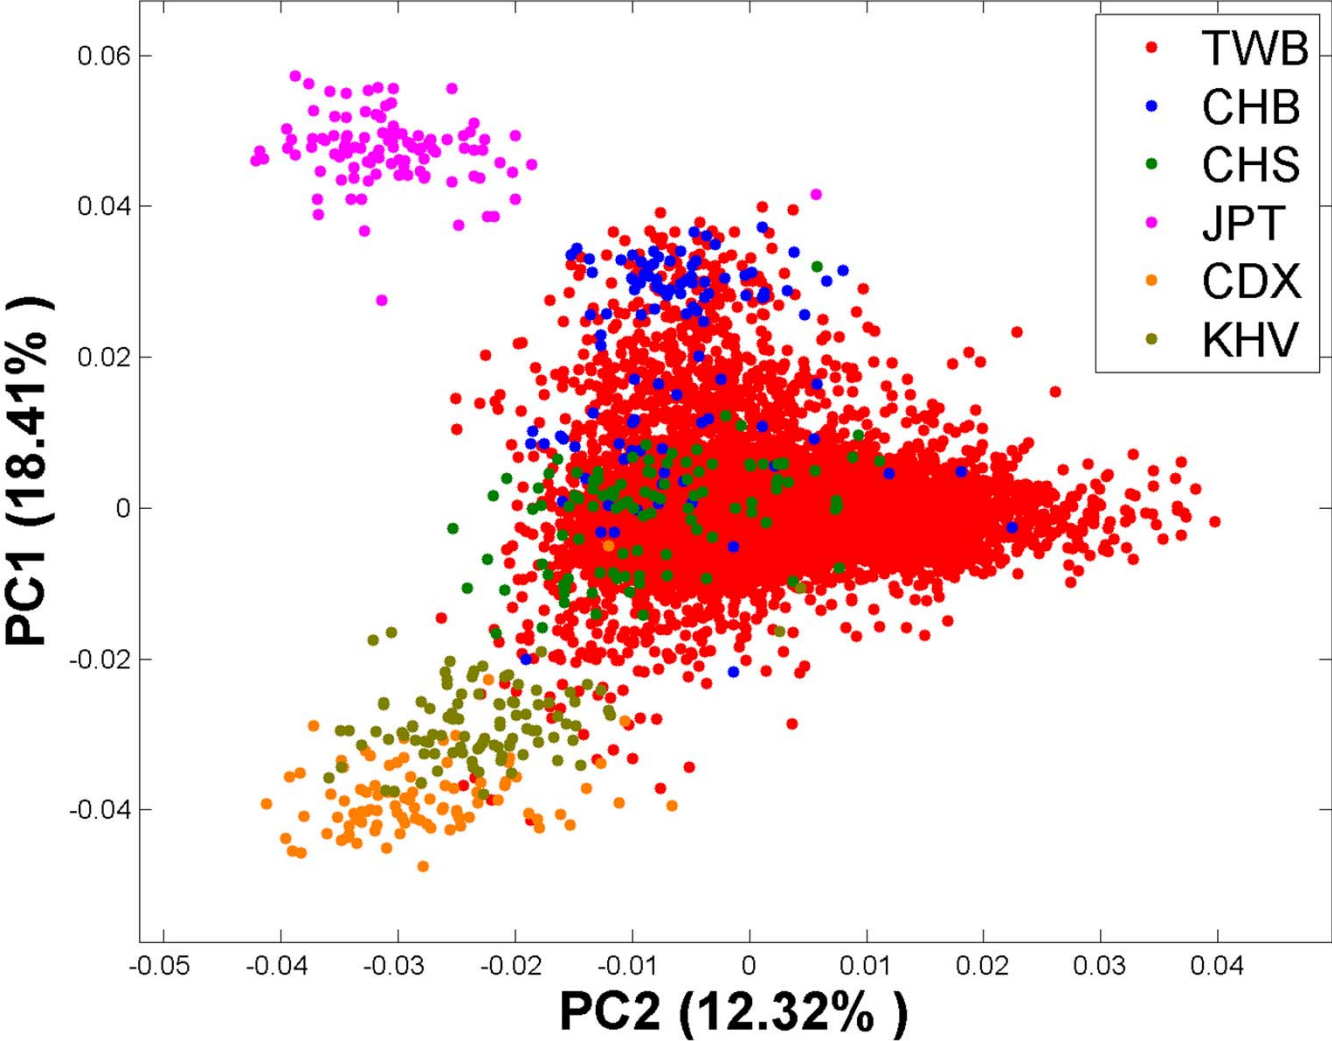

**S1C Fig**

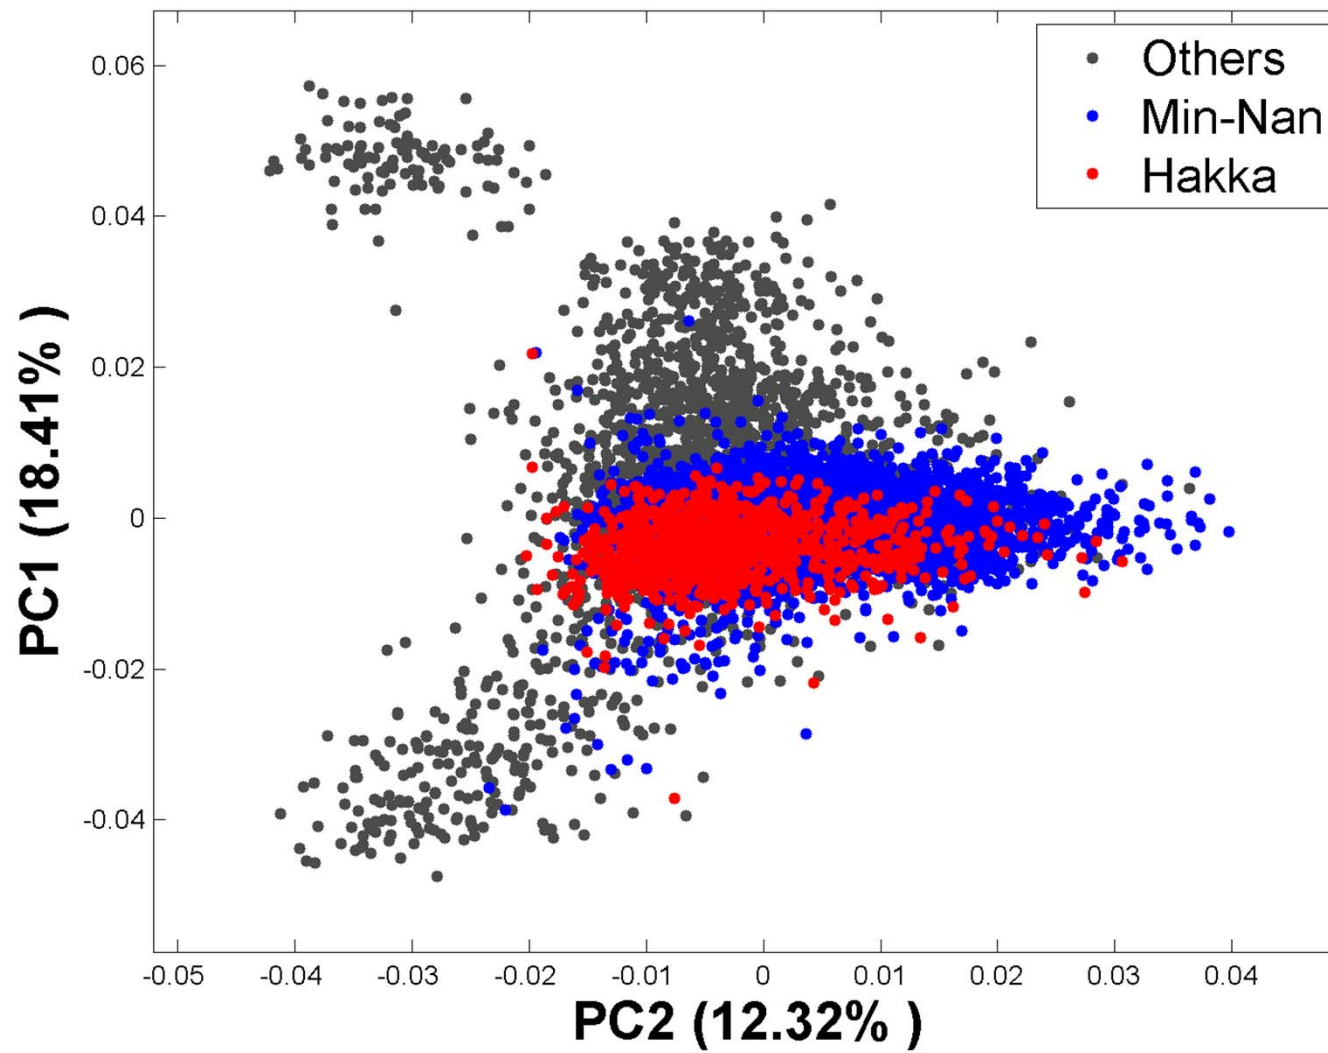

S1D

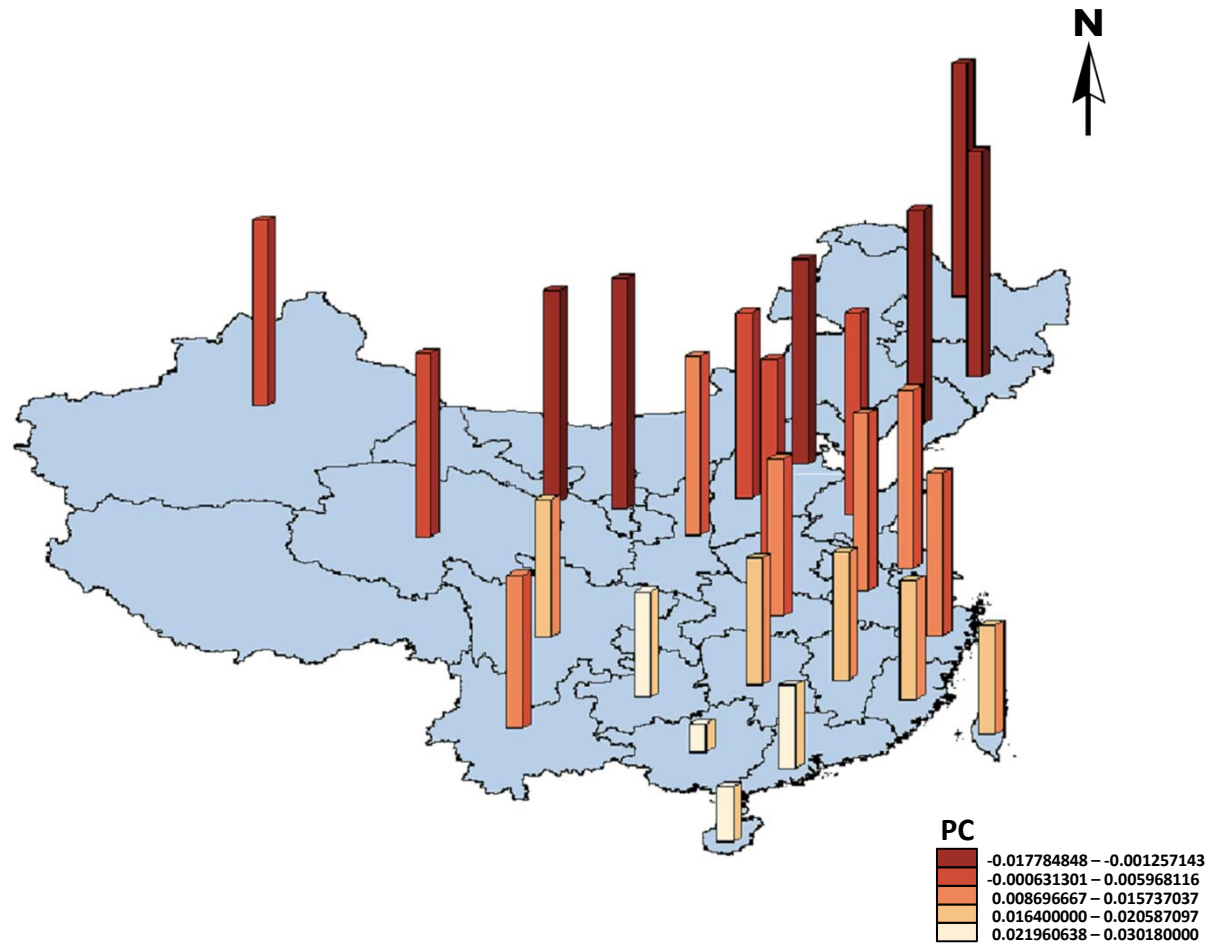

# S1E

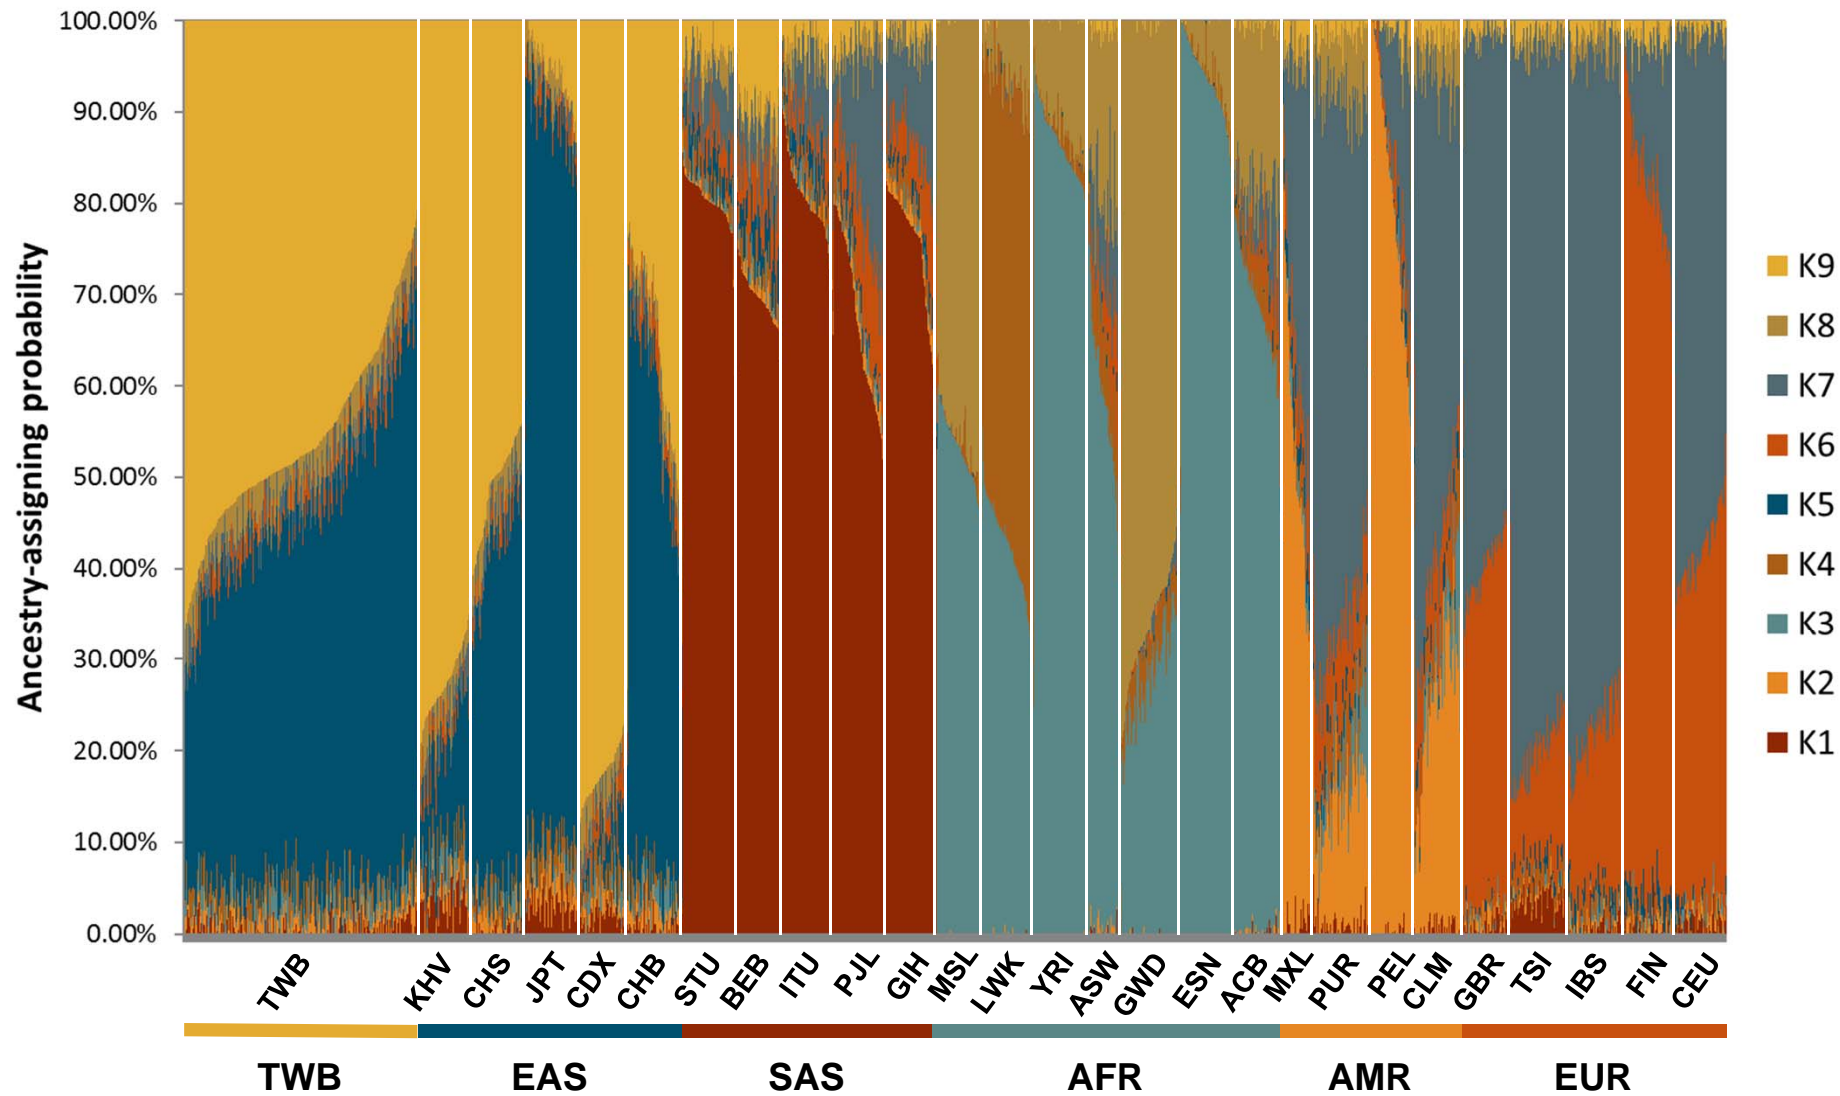

**S2 Fig. The current residence of the four subgroups (N, S2, T1 and S1)\*.**

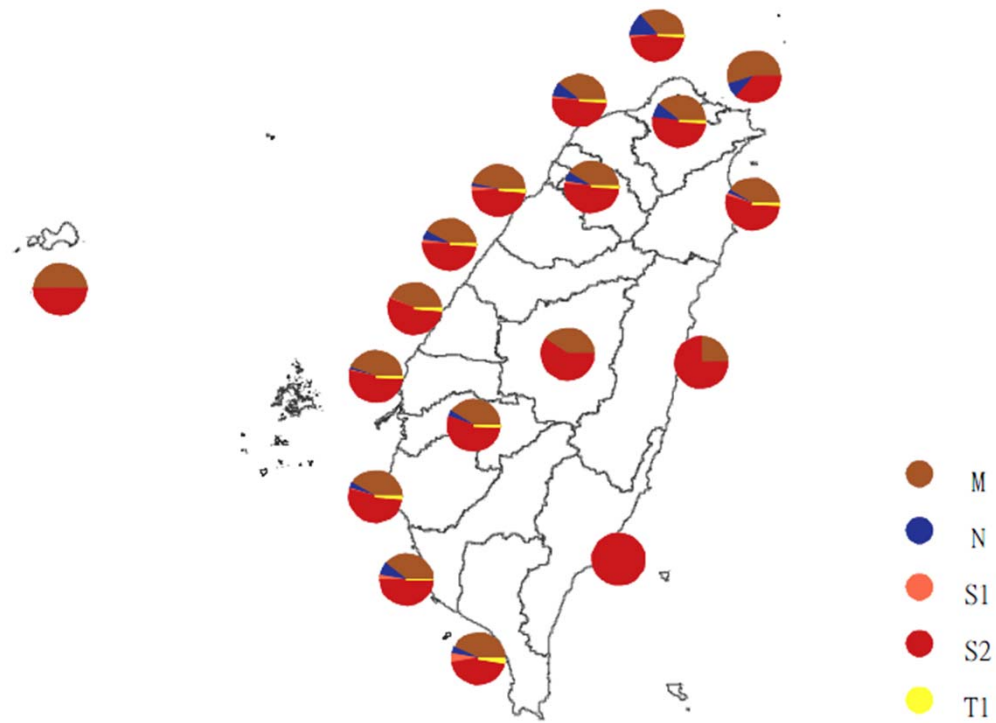

\* M represents the mix of the four subgroups.



**S3 Fig. Allele frequencies of the major alleles of the top SNPs identified in the N-S GWAS.**

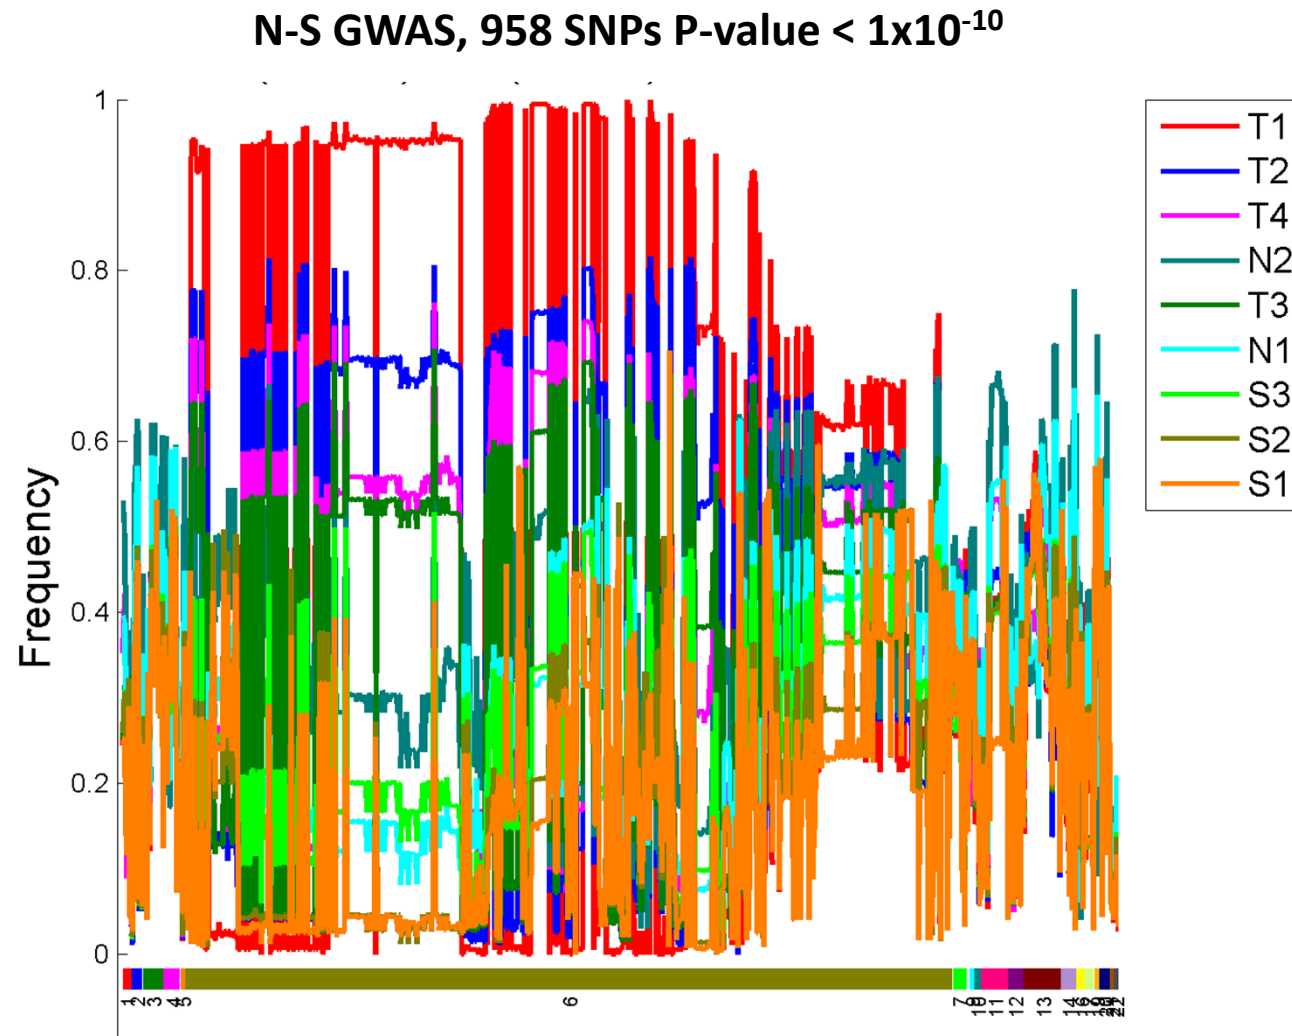

**S4 Fig. Haplotype similarity in the MHC region of chromosome 6 among different subgroups from the TWB detected by fineSTRUCTURE.** The figure is identical to Fig 4D, but different colors (same as those used in PCA in Fig 1C) were used to represent different subgroups in the S, N and T groups.

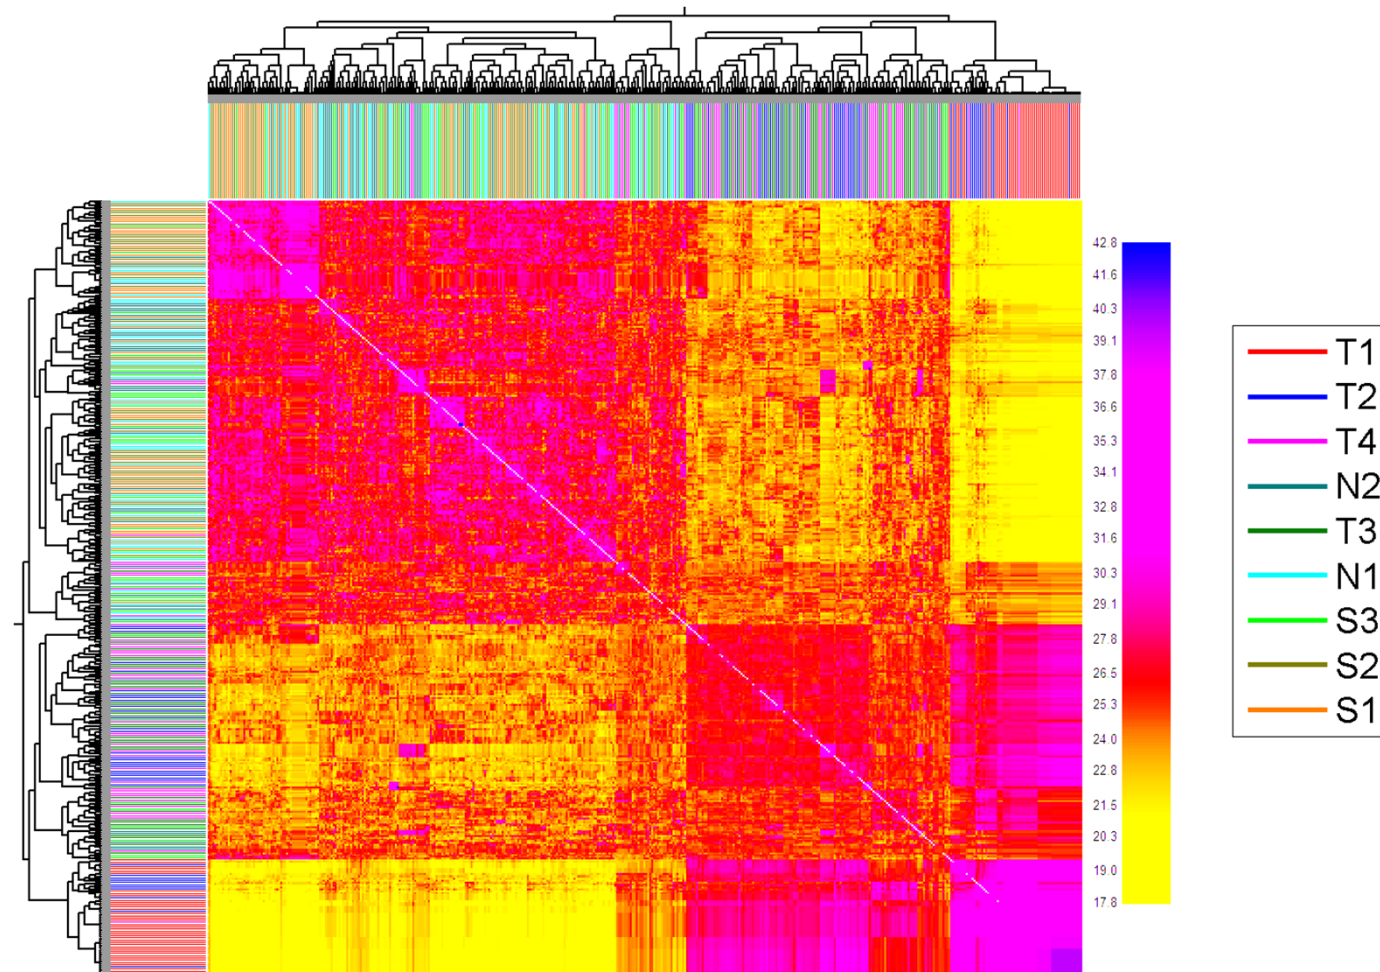

**S5 Fig. Proportion of the HLA-A\*33:03-B\*58:01 haplotype in the subgroups of 10,801 TWB participants. Imputation was performed using HIBAG and 36,763 SNPs.**

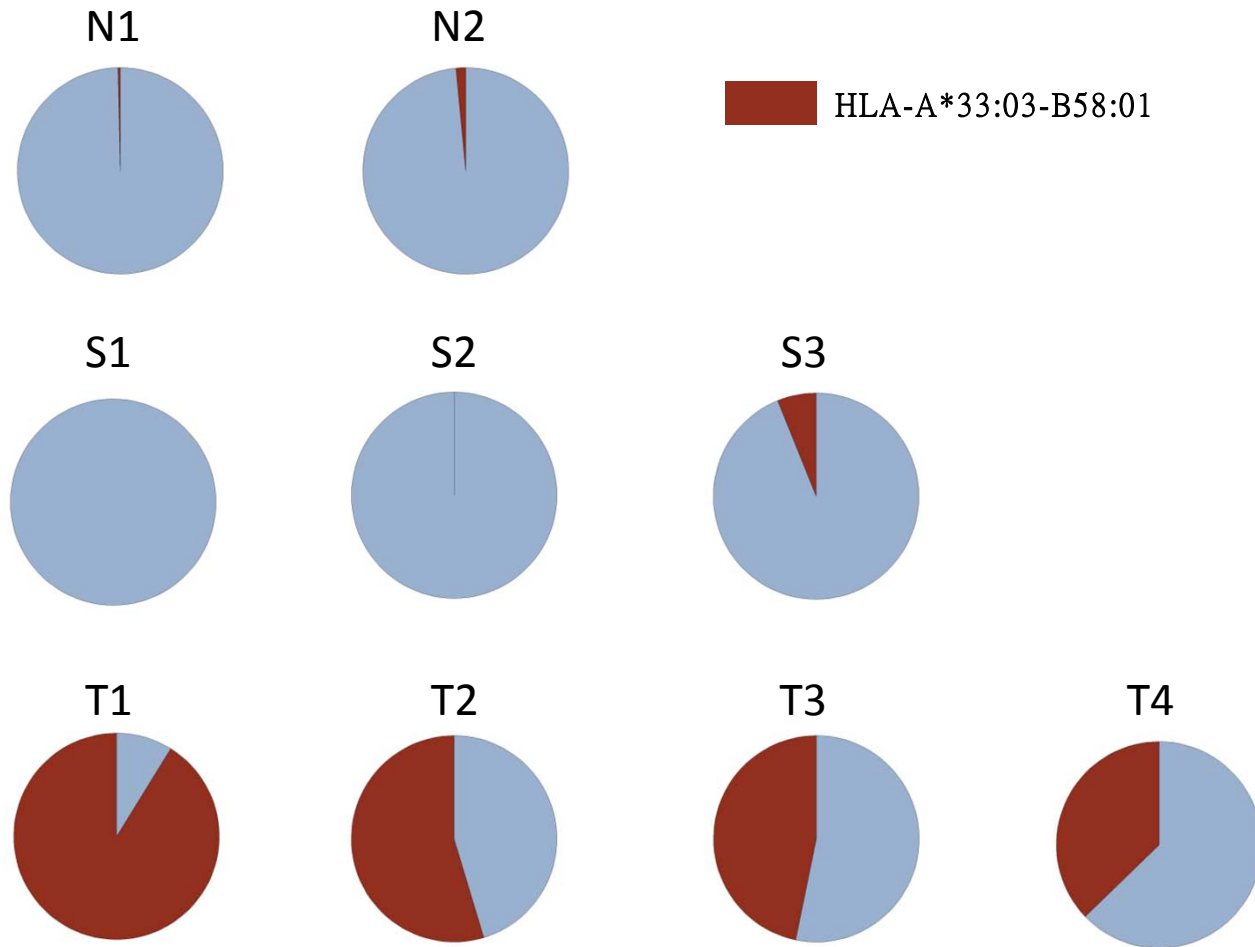

**S6 Fig. Significance levels (P values) of differences in the physical examination indices and biochemical measures between the (S2+S3) and the (T1–T4) subgroups.**

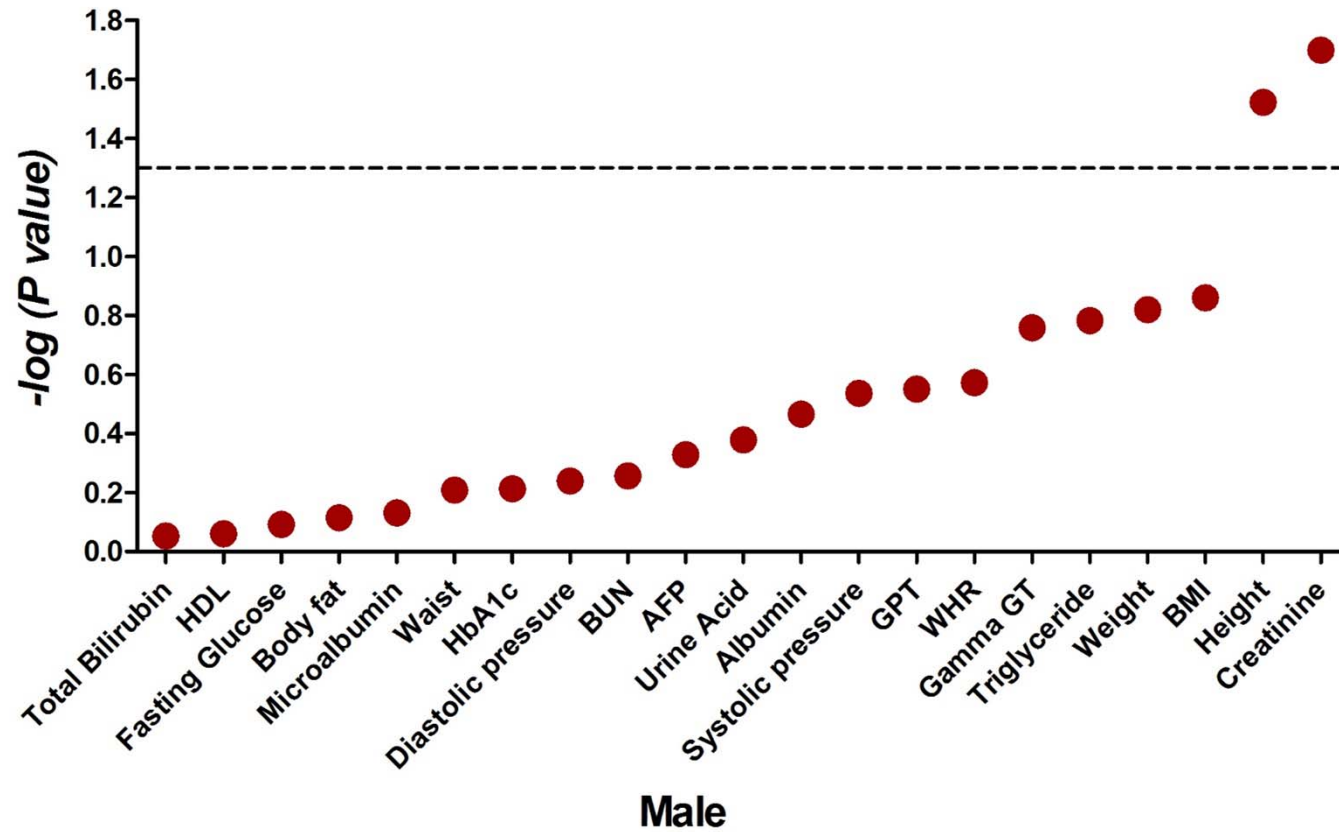

# S7 Fig. The proportion of HLA-A\*33:03-B\*58:01 in populations residing in east and southeast regions of Asia.

This figure is prepared based on data in <http://www.allelefrequencies.net/>.

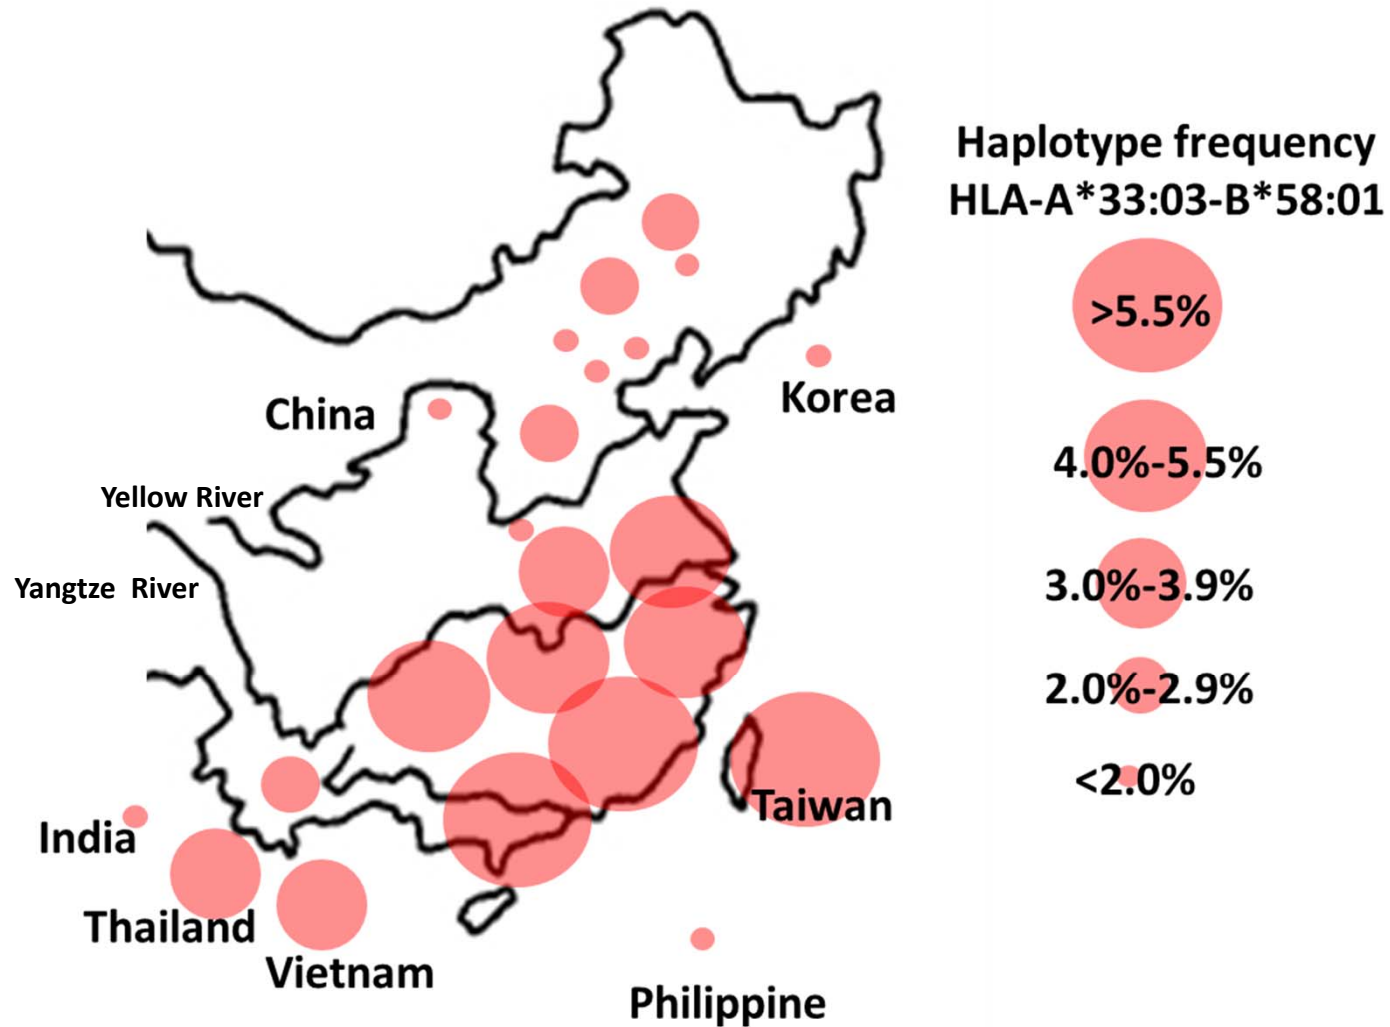

## S8 Fig. PCA plots for TWB and 1000G EAS (East Asian) samples with or without SNPs on chromosome 6.

PCA was performed for the TWB samples and for the EAS samples from the 1000G Project. The analysis was based on a set of 172,899 SNPs with MAFs > 5% in both datasets that were selected to be equally spaced across the human genome. The subgroups of TWB were denoted in parentheses whenever applicable; TWB (others) denoted the TWB samples not specified in the plot.

(A) PCA was carried out with the full set of samples and the full set of SNPs. The PCA plot showed a tripartite population structure as found in Fig. 2A, although the relative positions of PC1 and PC2 had been swapped. (B) PCA was carried out with the full set of samples and a subset of SNPs, in which all SNPs on chromosome 6 were excluded. The PCA plot showed that the subgroups distributed along the north-south gradient (PC1) and that the subgroups of S and T clustered together.

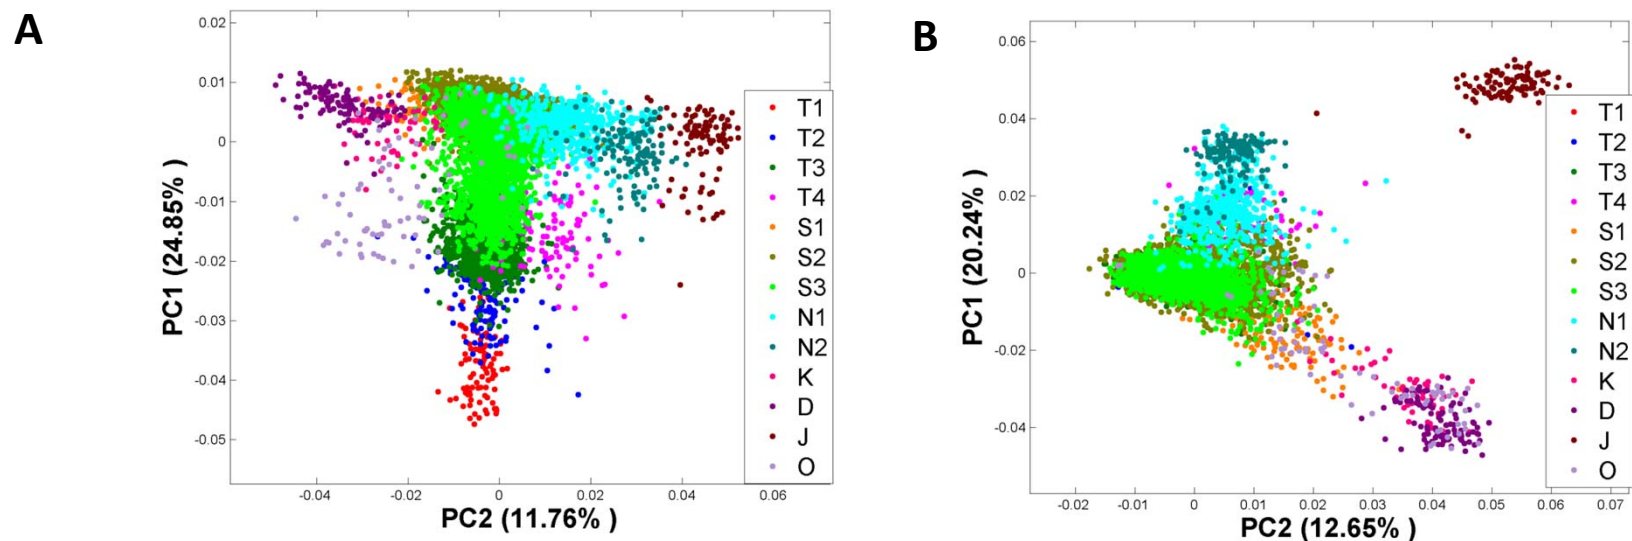



# S9 Fig. PCA plots for 1679, 3467 and 7200 subjects from TWB and 1000G East Asian samples.

PCA was performed for three subsets of TWB, (A) 1679 subjects (B) 3467 subjects and (C) 7200 subjects, and the 1000G East Asian samples. The analysis was based on a set of 16,824 SNPs with MAFs > 5% in both data sets that were selected to be equally spaced across the human genome. The up-panels are for PC1 and PC2 and the lower panels are for PC1 and PC3. "O" in these figures means others, unable to be defined.

**A**

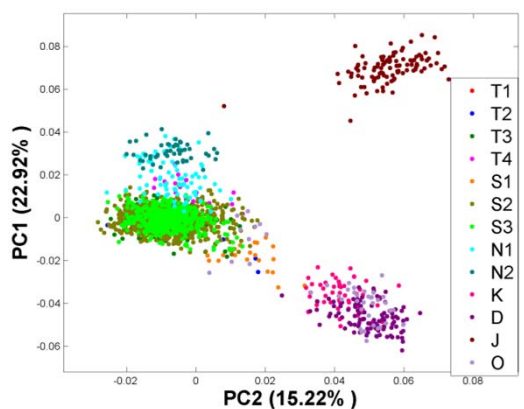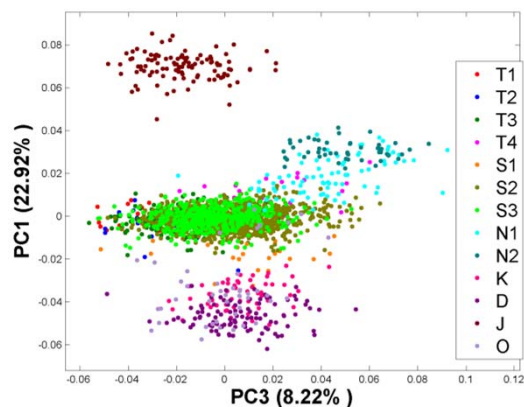

**B**

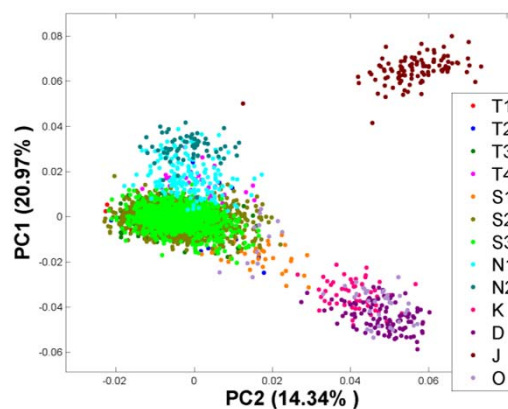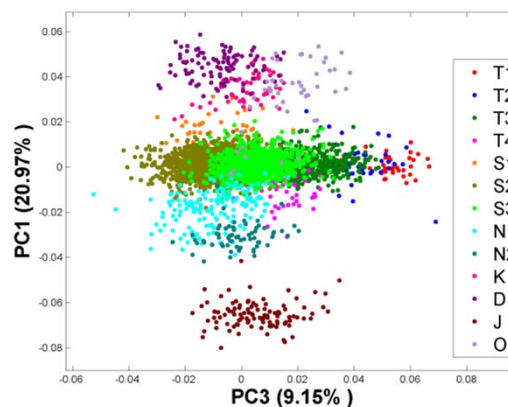

**C**

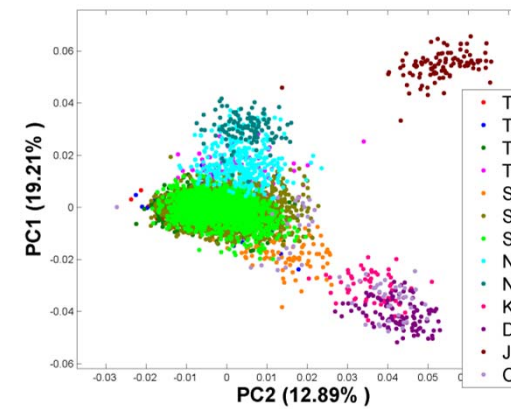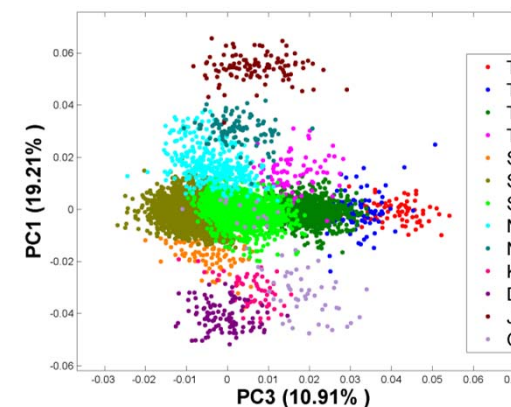

## **S10 Fig. Detection of uncertain kinship and ethnicity outliers among the genotyped samples.**

The detection of uncertain kinship and ethnicity outliers was determined with the following two steps.

- A. PCA was performed for TWB samples and 2504 1000G samples. The analysis was based on a set of 11,655 SNPs with minor allele frequencies (MAFs) > 5% in both datasets that were selected to be equally spaced across the human genome. All TWB samples were clustered with the Asian samples of HapMap III. No ethnicity outliers were excluded from further analyses to preserve the maximum information of the genotyped samples.
  
- B. IBS plot of the first three batches of TWB samples. Related individuals were clustered based on the pairwise IBS distance between the two individuals of each pair (x axis) and the proportion of SNPs at which the pair shared 0 alleles (IBS0\_rate, y axis). The cutoff was determined as the minimum IBS distance score of 100 simulated pairs of cousins based on the allele frequencies of the original TWB data. The samples of the fourth batch were analyzed with the same procedure and the same cutoff. The filtered independent samples from the first three batches and from the fourth batch were pooled together for an additional kinship test.



## S10A

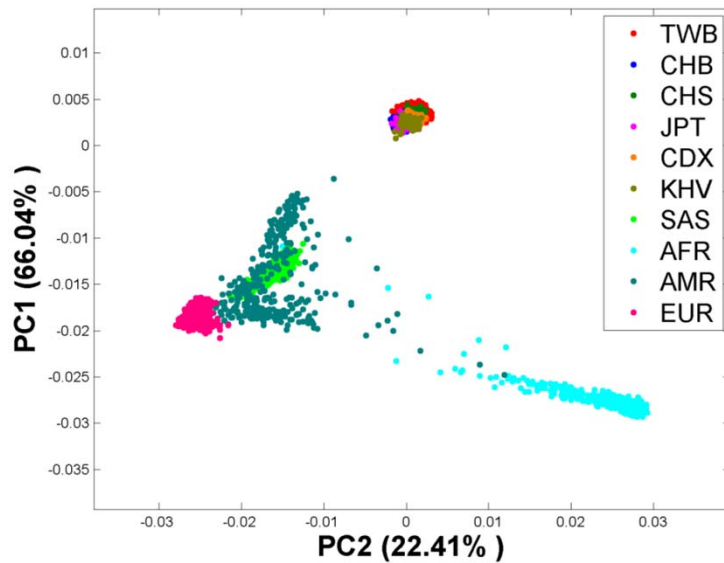

**TWB** Taiwan Biobank samples  
**CHB** Han Chinese in Beijing, China  
**JPT** Japanese in Tokyo, Japan  
**CHS** Southern Han Chinese  
**CDX** Chinese Dai in Xishuangbanna, China  
**KHV** Kinh in Ho Chi Minh City, Vietnam  
**AFR,** African  
**AMR** Ad Mixed American  
**EAS** East Asian  
**EUR** European  
**SAS** South Asian

## S10B

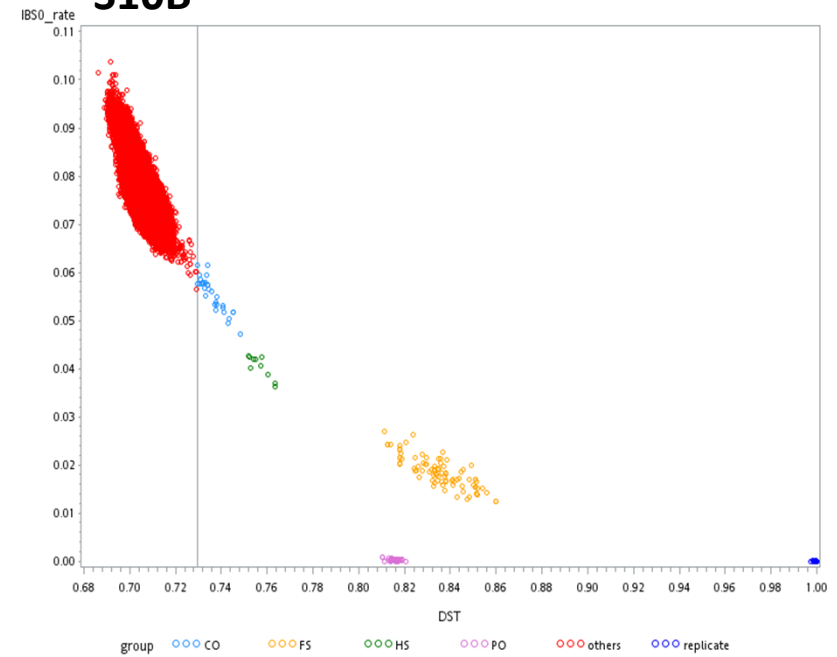

### Paired kinship groups:

**CO:** pair of cousins  
**FS:** pair of full siblings  
**HS:** pair of half siblings,  
**PO:** parent-offspring pair  
**Replicate:** DNA samples from the sample subject  
**Other:** pairs not classified
